# Supplementary material for: Naturally Acquired Humoral Immunity against Malaria Parasites in Non-Human Primates from the Brazilian Amazon, Cerrado and Atlantic Forest
Source: MDPI journal article supplement (doi:10.3390/pathogens9070525), 2020-06-29
Supplement: s1 [file s1]

## Supplementary Information

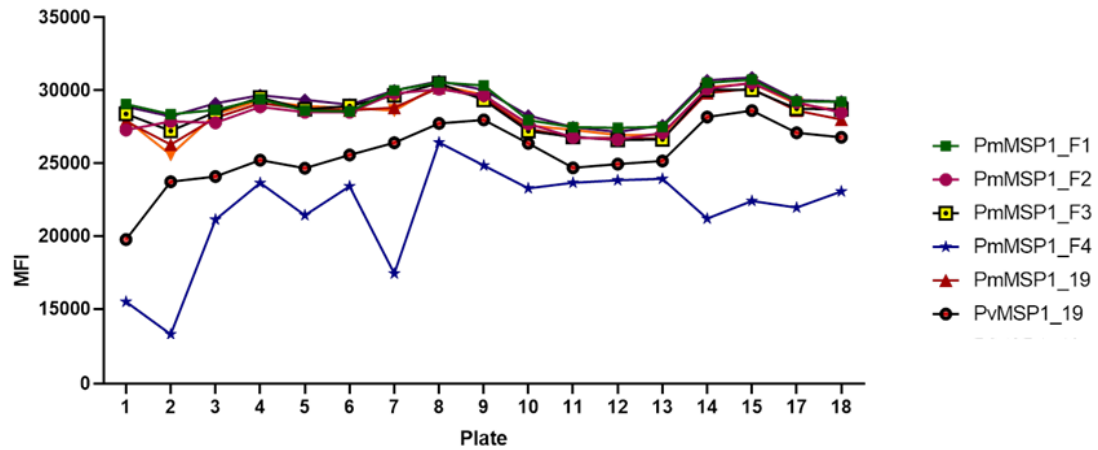

**Figure S1.** Coupling efficiency of recombinant proteins to magnetic beads. Coupling efficiency of recombinant proteins to magnetic beads was assessed by using biotinylated rabbit anti-GST polyclonal IgG antibody (Abcam, Cambridge, MA, USA), followed by incubation with R-phycoerythrin-labelled streptavidin and fluorescence measurement with the BioPlex 200 instrument (Bio-Rad, Hercules, CA, USA), as described in Materials and Methods.

**Table S1.** Absolute and relative frequencies of positive free-living non-human primates by Bioplex assay per MSP1 protein.

| Family         | Species                              | Proteins             |         |                      |         |                      |         |                      |        |                      |         |                      |         |                      |        |
|----------------|--------------------------------------|----------------------|---------|----------------------|---------|----------------------|---------|----------------------|--------|----------------------|---------|----------------------|---------|----------------------|--------|
|                |                                      | PmMSP1 <sub>F1</sub> |         | PmMSP1 <sub>F2</sub> |         | PmMSP1 <sub>F3</sub> |         | PmMSP1 <sub>F4</sub> |        | PmMSP1 <sub>19</sub> |         | PvMSP1 <sub>19</sub> |         | PfMSP1 <sub>19</sub> |        |
| Aotidae        | <i>Aotus azarae</i>                  | -                    | (0/10)  | -                    | (0/10)  | 10.0                 | (1/10)  | -                    | (0/10) | 10.0                 | (1/10)  | -                    | (0/10)  | -                    | (0/10) |
|                | <i>Aotus</i> sp.                     | -                    | (0/4)   | -                    | (0/4)   | -                    | (0/4)   | -                    | (0/4)  | -                    | (0/4)   | -                    | (0/4)   | -                    | (0/4)  |
| Atelidae       | <i>Alouatta belzebul</i>             | 100.0                | (1/1)   | -                    | (0/1)   | 100.0                | (1/1)   | -                    | (0/1)  | -                    | (0/1)   | -                    | (0/1)   | -                    | (0/1)  |
|                | <i>Alouatta caraya</i>               | 1.2                  | (1/86)  | 2.3                  | (2/86)  | 1.2                  | (1/86)  | -                    | (0/86) | 1.2                  | (1/86)  | 1.2                  | (1/86)  | 1.2                  | (1/86) |
|                | <i>Alouatta guariba</i>              | 29.8                 | (17/57) | 36.8                 | (21/57) | 28.1                 | (16/57) | 3.5                  | (2/57) | 33.3                 | (19/57) | 73.7                 | (42/57) | 1.8                  | (1/57) |
|                | <i>Alouatta puruensis</i>            | 35.7                 | (5/14)  | 42.9                 | (6/14)  | 28.6                 | (4/14)  | -                    | (0/14) | 28.6                 | (4/14)  | 7.1                  | (1/14)  | -                    | (0/14) |
|                | <i>Alouatta</i> sp.                  | 22.6                 | (12/53) | 11.3                 | (6/53)  | 22.6                 | (12/53) | 1.9                  | (1/53) | 22.6                 | (12/53) | 47.2                 | (25/53) | -                    | (0/53) |
|                | <i>Ateles chamek</i>                 | 73.3                 | (11/15) | 53.3                 | (8/15)  | 46.7                 | (7/15)  | 6.7                  | (1/15) | 53.3                 | (8/15)  | 6.7                  | (1/15)  | -                    | (0/15) |
|                | <i>Lagothrix cana</i>                | 69.2                 | (9/13)  | 69.2                 | (9/13)  | 69.2                 | (9/13)  | 15.4                 | (2/13) | 69.2                 | (9/13)  | 7.7                  | (1/13)  | 7.7                  | (1/13) |
| Callitrichidae | <i>Callithrix penicillata</i>        | -                    | (0/21)  | 4.8                  | (1/21)  | 38.1                 | (8/21)  | -                    | (0/21) | -                    | (0/21)  | -                    | (0/21)  | -                    | (0/21) |
|                | <i>Cebuella pygmaea niveiventris</i> | -                    | (0/1)   | -                    | (0/1)   | -                    | (0/1)   | -                    | (0/1)  | -                    | (0/1)   | -                    | (0/1)   | -                    | (0/1)  |
|                | <i>Leontocebus labiatus</i>          | -                    | (0/1)   | -                    | (0/1)   | -                    | (0/1)   | -                    | (0/1)  | -                    | (0/1)   | -                    | (0/1)   | -                    | (0/1)  |
|                | <i>Leontocebus weddelli</i>          | -                    | (0/5)   | -                    | (0/5)   | -                    | (0/5)   | -                    | (0/5)  | -                    | (0/5)   | -                    | (0/5)   | -                    | (0/5)  |
|                | <i>Mico melanurus</i>                | 50.0                 | (1/2)   | 50.0                 | (1/2)   | 50.0                 | (1/2)   | -                    | (0/2)  | -                    | (0/2)   | -                    | (0/2)   | -                    | (0/2)  |
| Cebidae        | <i>Cebus albifrons</i>               | 100.0                | (1/1)   | 100.0                | (1/1)   | 100.0                | (1/1)   | -                    | (0/1)  | -                    | (0/1)   | -                    | (0/1)   | -                    | (0/1)  |
|                | <i>Cebus</i> sp.                     | -                    | (0/1)   | -                    | (0/1)   | -                    | (0/1)   | -                    | (0/1)  | -                    | (0/1)   | -                    | (0/1)   | -                    | (0/1)  |
|                | <i>Saimiri boliviensis</i>           | 50.0                 | (1/2)   | -                    | (0/2)   | -                    | (0/2)   | -                    | (0/2)  | -                    | (0/2)   | -                    | (0/2)   | -                    | (0/2)  |
|                | <i>Saimiri</i> sp.                   | 100.0                | (1/1)   | -                    | (0/1)   | -                    | (0/1)   | -                    | (0/1)  | -                    | (0/1)   | -                    | (0/1)   | -                    | (0/1)  |
|                | <i>Saimiri ustus</i>                 | 41.7                 | (5/12)  | 41.7                 | (5/12)  | 41.7                 | (5/12)  | 16.7                 | (2/12) | 25.0                 | (3/12)  | 8.3                  | (1/12)  | 8.3                  | (1/12) |
|                | <i>Sapajus apella</i>                | 57.9                 | (11/19) | 36.8                 | (7/19)  | 26.3                 | (5/19)  | 21.1                 | (4/19) | 36.8                 | (7/19)  | 10.5                 | (2/19)  | 5.3                  | (1/19) |
|                | <i>Sapajus cay</i>                   | -                    | (0/1)   | 100.0                | (1/1)   | -                    | (0/1)   | -                    | (0/1)  | -                    | (0/1)   | -                    | (0/1)   | -                    | (0/1)  |
| Pitheciidae    | <i>Sapajus macrocephalus</i>         | 33.3                 | (1/3)   | 33.3                 | (1/3)   | 33.3                 | (1/3)   | 33.3                 | (1/3)  | 33.3                 | (1/3)   | -                    | (0/3)   | -                    | (0/3)  |
|                | <i>Chiropotes albinasus</i>          | 50.0                 | (1/2)   | 50.0                 | (1/2)   | 50.0                 | (1/2)   | -                    | (0/2)  | -                    | (0/2)   | -                    | (0/2)   | -                    | (0/2)  |
|                | <i>Pithecia mittermeieri</i>         | 40.0                 | (10/25) | 16.0                 | (4/25)  | 24.0                 | (6/25)  | -                    | (0/25) | 36.0                 | (9/25)  | -                    | (0/25)  | 4.0                  | (1/25) |
|                | <i>Plecturocebus brunneus</i>        | 21.4                 | (3/14)  | 14.3                 | (2/14)  | 14.3                 | (2/14)  | -                    | (0/14) | 21.4                 | (3/14)  | -                    | (0/14)  | -                    | (0/14) |
|                | <i>Plecturocebus dubius</i>          | 66.7                 | (2/3)   | 33.3                 | (1/3)   | 33.3                 | (1/3)   | -                    | (0/3)  | -                    | (0/3)   | -                    | (0/3)   | -                    | (0/3)  |
|                | <i>Plecturocebus</i> sp.             | 33.3                 | (2/6)   | 16.7                 | (1/6)   | -                    | (0/6)   | -                    | (0/6)  | 16.7                 | (1/6)   | 16.7                 | (1/6)   | -                    | (0/6)  |

**Table S2.** Absolute and relative frequencies of positive captive non-human primates by Bioplex assay per MSP1 protein.

| Family          | Species                        | Proteins             |        |                      |        |                      |        |                      |        |                      |        |                      |         |                      |        |
|-----------------|--------------------------------|----------------------|--------|----------------------|--------|----------------------|--------|----------------------|--------|----------------------|--------|----------------------|---------|----------------------|--------|
|                 |                                | PmMSP1 <sub>F1</sub> |        | PmMSP1 <sub>F2</sub> |        | PmMSP1 <sub>F3</sub> |        | PmMSP1 <sub>F4</sub> |        | PmMSP1 <sub>19</sub> |        | PvMSP1 <sub>19</sub> |         | PfMSP1 <sub>19</sub> |        |
| Atelidae        | <i>Alouatta caraya</i>         | -                    | (0/4)  | -                    | (0/4)  | -                    | (0/4)  | -                    | (0/4)  | -                    | (0/4)  | 25.0                 | (1/4)   | -                    | (0/4)  |
|                 | <i>Alouatta guariba</i>        | 10.8                 | (4/37) | 10.8                 | (4/37) | 8.1                  | (3/37) | -                    | (0/37) | 2.7                  | (1/37) | 27.0                 | (10/37) | -                    | (0/37) |
|                 | <i>Alouatta</i> sp.            | -                    | (0/7)  | 14.3                 | (1/7)  | -                    | (0/7)  | -                    | (0/7)  | -                    | (0/7)  | 42.9                 | (3/7)   | -                    | (0/7)  |
|                 | <i>Ateles chamek</i>           | 28.6                 | (2/7)  | 14.3                 | (1/7)  | 14.3                 | (1/7)  | -                    | (0/7)  | 14.3                 | (1/7)  | -                    | (0/7)   | -                    | (0/7)  |
|                 | <i>Ateles marginatus</i>       | 50.0                 | (1/2)  | -                    | (0/2)  | -                    | (0/2)  | -                    | (0/2)  | 50.0                 | (1/2)  | -                    | (0/2)   | -                    | (0/2)  |
|                 | <i>Ateles paniscus</i>         | 50.0                 | (2/4)  | 25.0                 | (1/4)  | -                    | (0/4)  | 25.0                 | (1/4)  | 25.0                 | (1/4)  | -                    | (0/4)   | -                    | (0/4)  |
|                 | <i>Ateles</i> sp.              | -                    | (0/2)  | -                    | (0/2)  | -                    | (0/2)  | -                    | (0/2)  | -                    | (0/2)  | -                    | (0/2)   | -                    | (0/2)  |
|                 | <i>Brachyteles arachnoides</i> | 25.0                 | (1/4)  | 25.0                 | (1/4)  | 50.0                 | (2/4)  | -                    | (0/4)  | 25.0                 | (1/4)  | 50.0                 | (2/4)   | -                    | (0/4)  |
|                 | <i>Lagothrix cana</i>          | 20.0                 | (1/5)  | 40.0                 | (2/5)  | 40.0                 | (2/5)  | -                    | (0/5)  | 40.0                 | (2/5)  | 40.0                 | (2/5)   | -                    | (0/5)  |
|                 | <i>Lagothrix lagothricha</i>   | 50.0                 | (1/2)  | 50.0                 | (1/2)  | -                    | (0/2)  | -                    | (0/2)  | -                    | (0/2)  | -                    | (0/2)   | -                    | (0/2)  |
|                 | <i>Lagothrix poeppigii</i>     | 100.0                | (1/1)  | 100.0                | (1/1)  | -                    | (0/1)  | -                    | (0/1)  | -                    | (0/1)  | -                    | (0/1)   | -                    | (0/1)  |
| Cebidae         | <i>Cebus kaapori</i>           | -                    | (0/3)  | -                    | (0/3)  | -                    | (0/3)  | 33.3                 | (1/3)  | -                    | (0/3)  | -                    | (0/3)   | -                    | (0/3)  |
|                 | <i>Cebus</i> sp.               | -                    | (0/4)  | -                    | (0/4)  | -                    | (0/4)  | -                    | (0/4)  | -                    | (0/4)  | -                    | (0/4)   | -                    | (0/4)  |
|                 | <i>Sapajus apella</i>          | -                    | (0/22) | -                    | (0/22) | 9.1                  | (2/22) | 4.5                  | (1/22) | 4.5                  | (1/22) | -                    | (0/22)  | 9.1                  | (2/22) |
|                 | <i>Sapajus flavius</i>         | -                    | (0/2)  | -                    | (0/2)  | -                    | (0/2)  | -                    | (0/2)  | -                    | (0/2)  | -                    | (0/2)   | -                    | (0/2)  |
|                 | <i>Sapajus xanthosternos</i>   | -                    | (0/1)  | -                    | (0/1)  | -                    | (0/1)  | -                    | (0/1)  | -                    | (0/1)  | -                    | (0/1)   | -                    | (0/1)  |
| Cercopithecidae | <i>Papio cynocephalus</i>      | -                    | (0/1)  | -                    | (0/1)  | -                    | (0/1)  | -                    | (0/1)  | -                    | (0/1)  | -                    | (0/1)   | -                    | (0/1)  |
| Hominidae       | <i>Pan troglodytes</i>         | -                    | (0/9)  | 11.1                 | (1/9)  | -                    | (0/9)  | -                    | (0/9)  | -                    | (0/9)  | 33.3                 | (3/9)   | -                    | (0/9)  |
|                 | <i>Pongo pygmaeus</i>          | -                    | (0/1)  | -                    | (0/1)  | -                    | (0/1)  | -                    | (0/1)  | -                    | (0/1)  | 100.0                | (1/1)   | -                    | (0/1)  |
| Hylobatidae     | <i>Hylobates lar</i>           | 100.0                | (1/1)  | -                    | (0/1)  | -                    | (0/1)  | -                    | (0/1)  | -                    | (0/1)  | -                    | (0/1)   | -                    | (0/1)  |
| Pitheciidae     | <i>Callicebus nigrifrons</i>   | -                    | (0/2)  | -                    | (0/2)  | 50.0                 | (1/2)  | -                    | (0/2)  | -                    | (0/2)  | 50.0                 | (1/2)   | -                    | (0/2)  |
|                 | <i>Plecturocebus</i> sp.       | -                    | (0/1)  | -                    | (0/1)  | -                    | (0/1)  | -                    | (0/1)  | -                    | (0/1)  | -                    | (0/1)   | -                    | (0/1)  |

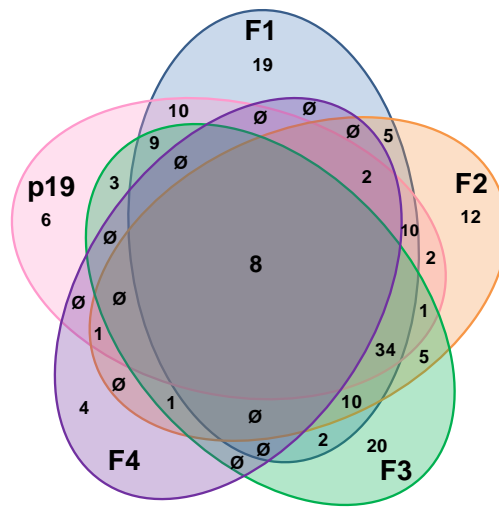

**Figure S2.** Intersection chart of positive samples against *Plasmodium malariae* antigens.
